# Supplementary material
Source: MDPI journal article supplement (https://www.mdpi.com/2073-4441/15/10/1880)
Supplement: s1 [file s1]

## Supplementary Table

**Supplementary Table S1.** Summary of predicted climate change scenarios over the study site.

| Climate Component       |       | RCP 2.6      | RCP 8.5       |
|-------------------------|-------|--------------|---------------|
| Monthly rainfall (mm)   | 2020s | 99.28±117.07 | 92.33±109.70  |
|                         | 2050s | 94.96±102.16 | 93.90±107.11  |
|                         | 2080s | 96.35±111.74 | 103.27±127.92 |
| Mean temperature (°C)   | 2020s | 12.77±9.51   | 12.51±9.55    |
|                         | 2050s | 13.37±9.61   | 14.12±9.81    |
|                         | 2080s | 13.30±9.46   | 15.95±9.80    |
| Relative humidity (%)   | 2020s | 71.98±6.87   | 71.47±6.67    |
|                         | 2050s | 71.77±6.67   | 71.52±6.19    |
|                         | 2080s | 71.70±6.38   | 72.84±6.35    |
| Mean wind speed (m/sec) | 2020s | 2.72±0.44    | 2.72±0.44     |
|                         | 2050s | 2.75±0.45    | 2.74±0.44     |
|                         | 2080s | 2.73±0.43    | 2.66±0.44     |
